# Supplementary material for: The β2-Subunit of Voltage-Gated Calcium Channels Regulates Cardiomyocyte Hypertrophy
Source: PubMed Central journal article supplement (PMC8292724; doi:10.3389/fcvm.2021.704657), 2021-07-07
Supplement: Data_Sheet_1.pdf [file Data_Sheet_1.pdf]

## The $\beta_2$ -subunit of voltage-gated calcium channels regulates cardiomyocyte hypertrophy

Simone Pickel<sup>1</sup>, Yiliam Cruz-Garcia<sup>1</sup>, Sandra Bandleon<sup>2</sup>, Katalin Barkovits<sup>3,4</sup>, Cornelia Heindl<sup>1</sup>, Katharina Völker<sup>1</sup>, Marco Abeßer<sup>1</sup>, Kathy Pfeiffer<sup>3,4</sup>, Alice Schaaf<sup>2</sup>, Katrin Marcus<sup>3,4</sup>, Petra Eder-Negrin<sup>2</sup>, Michaela Kuhn<sup>1,2</sup> and Erick Miranda-Laferte<sup>5,1\*</sup>

From the. <sup>1</sup>Institute of Physiology, University of Würzburg, Würzburg, Germany; <sup>2</sup>Comprehensive Heart Failure Center, University Hospital Würzburg, Würzburg, Germany; <sup>3</sup>Medizinisches Proteom-Center, Medical Faculty, Ruhr-University Bochum, Bochum, Germany. <sup>4</sup>Medical Proteome Analysis, Center for Proteindiagnostics (PRODI), Ruhr-University Bochum, Bochum, Germany; <sup>5</sup>Institut für Biologische Informationsprozesse, Molekular- und Zellphysiologie (IBI-1), Forschungszentrum Jülich, Jülich, Germany.

### Supporting Information

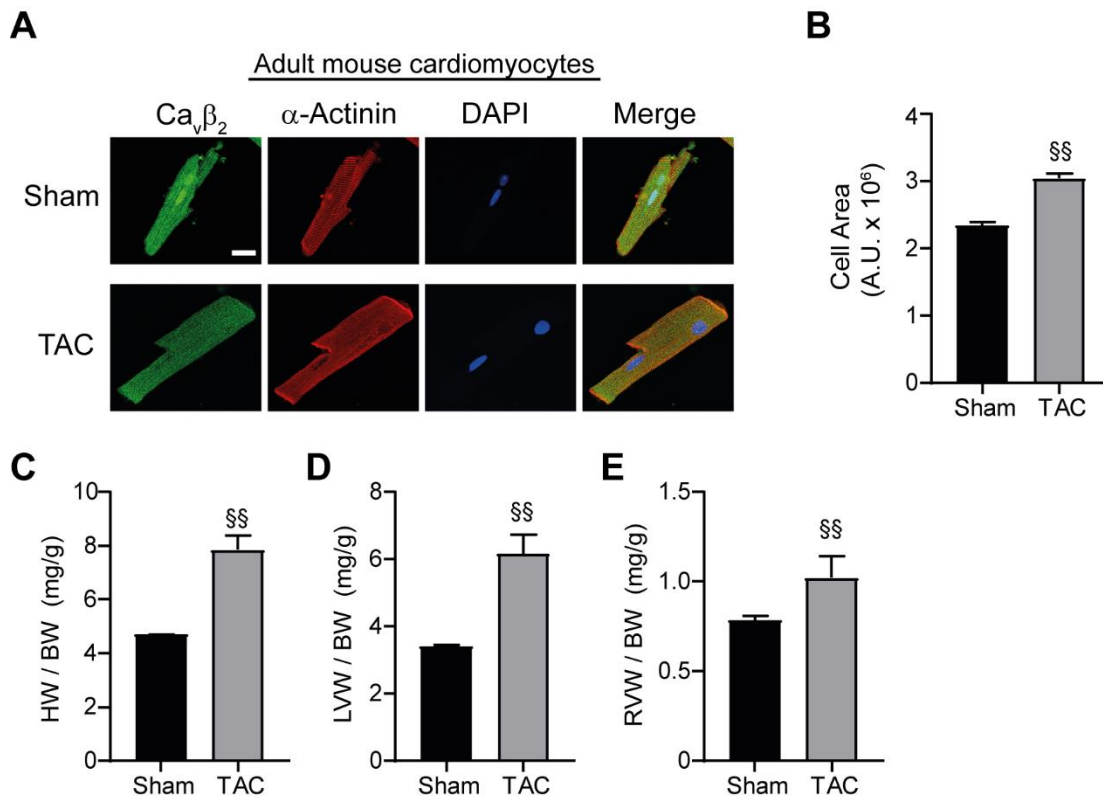

Figure S1. **Transverse aortic constriction induces left ventricle hypertrophy in adult mice.** (A) Confocal fluorescence images of representative adult mouse cardiomyocytes from sham- and TAC-operated mice stained for  $Ca_v\beta_2$  (green),  $\alpha$ -actinin (red) and nucleus (DAPI, blue). Scale bar represents 15  $\mu$ m. (B) Bar plot of the mean values of cardiomyocyte cell area from sham-operated (n=280 cells) and TAC-operated mice (n=210 cells). Cells from 3 animals per group were measured. (C-E) Bar plots of the mean values of the heart-to-body weight ratio (C), the left ventricle-to-body weight ratio (D) and the right ventricle-to-body weight ratio (E) from sham-operated (n=3) and TAC-operated mice (n=3). Mean  $\pm$  SEM; §§ p<0.01 (two-tailed unpaired t-test).

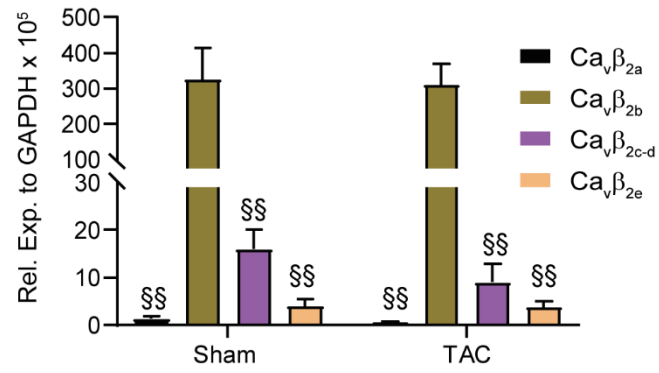

Figure S2. **Ca<sub>v</sub>β<sub>2</sub> splice variants have similar expression in sham- and TAC-operated mice.** Bar plot of the qRT-PCR analyses of the expression of Ca<sub>v</sub>β<sub>2</sub> splice variants in heart samples from sham- (n=3) and TAC-operated (n=3) mice. Mean ± SEM; §§ p<0.01 vs Ca<sub>v</sub>β<sub>2b</sub> expression in the same group. (two-way ANOVA with Holm–Sidak’s method).
