# Supplementary material for: The β2-Subunit of Voltage-Gated Calcium Channels Regulates Cardiomyocyte Hypertrophy
Source: PubMed Central journal article supplement (PMC8292724; doi:10.3389/fcvm.2021.704657), 2021-07-07
Supplement: Table_1.pdf [file Table_1.pdf]

**Table S1. List of upregulated and downregulated proteins identified by LC-MS analyses in Ca<sub>v</sub>β<sub>2</sub>-downregulated NRCs****Upregulated Proteins**

| Acc Num | Description                                                   | Peptide count | Unique peptides | Anova p-value | Fold Change |
|---------|---------------------------------------------------------------|---------------|-----------------|---------------|-------------|
| P0C0S7  | Histone H2A.Z                                                 | 7             | 3               | 0.039372      | 2.36        |
| Q53UA7  | Serine/threonine-protein kinase TAO3                          | 6             | 1               | 0.0478008     | 1.93        |
| Q9QWJ9  | Neuropilin-1                                                  | 2             | 2               | 0.0249368     | 1.81        |
| Q9Z330  | DNA (cytosine-5)-methyltransferase 1                          | 2             | 1               | 0.0056253     | 1.71        |
| Q9QXU2  | Surfeit locus protein 1                                       | 2             | 2               | 0.0418875     | 1.60        |
| Q8K1Q0  | Glycylpeptide N-tetradecanoyltransferase 1                    | 5             | 3               | 0.0293166     | 1.59        |
| Q56A27  | Nuclear cap-binding protein subunit 1                         | 3             | 2               | 0.0413061     | 1.54        |
| Q64578  | Sarcoplasmic/endoplasmic reticulum calcium ATPase 1           | 27            | 2               | 0.0246706     | 1.40        |
| Q9QZ81  | Protein argonaute-2                                           | 2             | 1               | 0.0310035     | 1.39        |
| P09456  | cAMP-dependent protein kinase type I-alpha regulatory subunit | 26            | 18              | 0.0075715     | 1.32        |
| Q9Z1A5  | NEDD8-activating enzyme E1 regulatory subunit                 | 4             | 3               | 0.023091      | 1.31        |
| Q09073  | ADP/ATP translocase 2                                         | 36            | 7               | 0.0402633     | 1.28        |
| P16036  | Phosphate carrier protein, mitochondrial                      | 17            | 15              | 0.0430052     | 1.23        |
| Q4FZT9  | 26S proteasome non-ATPase regulatory subunit 2                | 17            | 16              | 0.0412072     | 1.17        |
| P14882  | Propionyl-CoA carboxylase alpha chain, mitochondrial          | 20            | 17              | 0.0137137     | 1.12        |
| Q03346  | Mitochondrial-processing peptidase subunit beta               | 12            | 12              | 0.0349569     | 1.11        |

## Downregulated Proteins

| Acc Num | Description                                                      | Peptide count | Unique peptides | Anova p-value | Fold Change |
|---------|------------------------------------------------------------------|---------------|-----------------|---------------|-------------|
| Q8R560  | Ankyrin repeat domain-containing protein 1                       | 6             | 6               | 0.0002578     | 2.99        |
| P09760  | Tyrosine-protein kinase Fer                                      | 4             | 1               | 0.031466      | 2.62        |
| Q9Z2Q7  | Syntaxin-8                                                       | 2             | 2               | 0.0025648     | 2.04        |
| Q5XIM5  | Protein CDV3 homolog                                             | 3             | 3               | 0.0260633     | 1.82        |
| P63088  | Serine/threonine-protein phosphatase PP1-gamma catalytic subunit | 11            | 1               | 0.0219534     | 1.79        |
| P50442  | Glycine amidinotransferase, mitochondrial                        | 2             | 2               | 0.0024302     | 1.79        |
| Q63258  | Integrin alpha-7                                                 | 5             | 5               | 0.0143161     | 1.76        |
| O35783  | Calumenin                                                        | 5             | 5               | 0.0395409     | 1.74        |
| P29534  | Vascular cell adhesion protein 1                                 | 2             | 1               | 0.0481784     | 1.73        |
| O35760  | Isopentenyl-diphosphate Delta-isomerase 1                        | 4             | 4               | 0.0165448     | 1.61        |
| Q08290  | Calponin-1                                                       | 3             | 2               | 0.0149159     | 1.56        |
| Q6AXT5  | Ras-related protein Rab-21                                       | 3             | 3               | 0.043885      | 1.55        |
| O88664  | Serine/threonine-protein kinase TAO1                             | 5             | 1               | 0.0500006     | 1.52        |
| P23693  | Troponin I, cardiac muscle                                       | 15            | 13              | 0.0423728     | 1.50        |
| P04762  | Catalase                                                         | 30            | 30              | 0.0393255     | 1.44        |
| P15800  | Laminin subunit beta-2                                           | 5             | 3               | 0.007082      | 1.41        |
| Q5PQP9  | Armadillo repeat-containing protein 5                            | 2             | 1               | 0.0429086     | 1.41        |
| Q9ESN0  | Protein Niban                                                    | 4             | 4               | 0.0441999     | 1.38        |
| P47198  | 60S ribosomal protein L22                                        | 3             | 2               | 0.0238242     | 1.33        |
| B2GV06  | Succinyl-CoA:3-ketoacid coenzyme A transferase 1, mitochondrial  | 29            | 26              | 0.0220293     | 1.33        |
| Q9R0T3  | DnaJ homolog subfamily C member 3                                | 3             | 3               | 0.0364996     | 1.29        |
| Q5U367  | Procollagen-lysine,2-oxoglutarate 5-dioxygenase 3                | 4             | 4               | 0.0122586     | 1.28        |
| P51583  | Multifunctional protein ADE2                                     | 7             | 6               | 0.0040127     | 1.23        |
| P0C5E3  | Palladin (Fragment)                                              | 9             | 9               | 0.0254724     | 1.21        |
| P12001  | 60S ribosomal protein L18                                        | 8             | 4               | 0.0261498     | 1.20        |
| P62083  | 40S ribosomal protein S7                                         | 10            | 9               | 0.0225552     | 1.19        |
| P27321  | Calpastatin                                                      | 4             | 2               | 0.0469852     | 1.18        |
| Q9ESS6  | Basal cell adhesion molecule                                     | 9             | 9               | 0.0249939     | 1.15        |
